# Supplementary material for: Integration of sleep homeostasis and navigation in Drosophila
Source: PubMed Central journal article supplement (PMC8297946; doi:10.1371/journal.pcbi.1009088), 2021-07-12
Supplement: pcbi.1009088.s011.pdf [file pcbi.1009088.s011.pdf]

## S1 Text

| $\tau$ | $\tau_f$ | c     | $\tau_{EE}$ | $\tau_{IE}$ | $w_{EI}$ | $\theta$ | $r_0$ | $r_I^{(min)}$ | $r_I^{(max)}$ |
|--------|----------|-------|-------------|-------------|----------|----------|-------|---------------|---------------|
| 0.01   | 2        | 0.005 | 50          | 50          | 0.5      | 10       | 10    | 20            | 35            |

Table A: **Parameter values used in the two-population model.** Time constants  $\tau$ ,  $\tau_f$ ,  $\tau_{EE}$  and  $\tau_{IE}$  are measured in seconds. We consider the rest dimensionless quantities.

| $\tau$ | $\tau_f$ | c     | $\tau_{EE}$ | $\tau_{IE}$ | $w_{EI}$ | $\theta$ | $r_0$ | $r_I^{(min)}$ | $r_I^{(max)}$ | $w_{EE}^{(max)}$ | $\sigma$ | $I_{max}$ | $I_\sigma$ |
|--------|----------|-------|-------------|-------------|----------|----------|-------|---------------|---------------|------------------|----------|-----------|------------|
| 0.01   | 2        | 0.005 | 50          | 50          | 0.5      | 10       | 10    | 22            | 30            | 0.3              | 1.5      | 5         | 2          |

Table B: **Parameter values used in the ring attractor network.** As in the previous model, time constants  $\tau$ ,  $\tau_f$ ,  $\tau_{EE}$  and  $\tau_{IE}$  are measured in seconds. We consider the rest dimensionless quantities.

### Ring attractor network: resetting the weights during sleep without autonomous activity

Assuming anti-Hebbian plasticity in the ring attractor network during sleep leads to autonomous dynamics (section 2.7). A different way to reset the network connectivity  $w_{EE}^{(ij)}(t)$  is to relax it to its initial values over the sleep phase:

$$\tau_{EE} w_{EE}^{(ij)}(t) = -w_{EE}^{(ij)}(t) + w_{EE}^{(ij)}(0) \quad \text{for } i, j = 1, \dots, N. \quad (1)$$

S10A Fig shows a simulation of the ring attractor model using this type of plasticity during sleep. During the wake phase the dynamics of the model does not change (top, white regions). However, during sleep the plasticity rule keeps the bump in wedge neurons in place (top, grey regions), maintaining the last head direction of the fly before the sleep phase while the activity of R5 neurons slowly decreases. As with the two-population model (Methods 4.5), the timescale of sleep and wake phases depends on the time constants of the plasticity rules.
